# Supplementary material for: Hybridization State Detection of DNA-Functionalized Gold Nanoparticles Using Hyperspectral Imaging
Source: Hindawi journal article supplement (doi:10.1155/2017/8427459), 2017-01-01
Supplement: f1 [file 8427459.f1.pdf]

## SUPPLEMENTAL INFORMATION

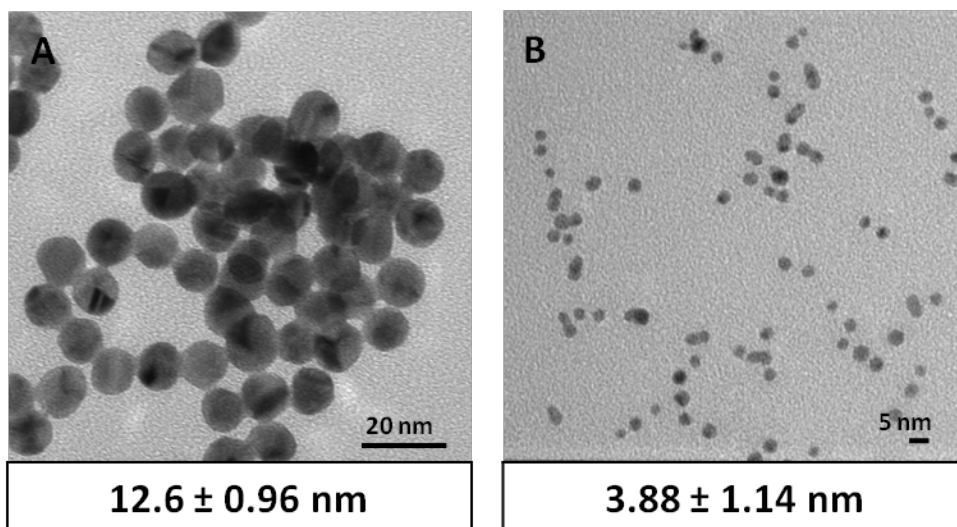

**Figure S1. TEM Imaging of 13 nm and 4 nm Au NPs.** (A) 13 nm Au NPs imaged at 200K X magnification. (B) 4 nm Au NPs imaged at 150K X magnification.

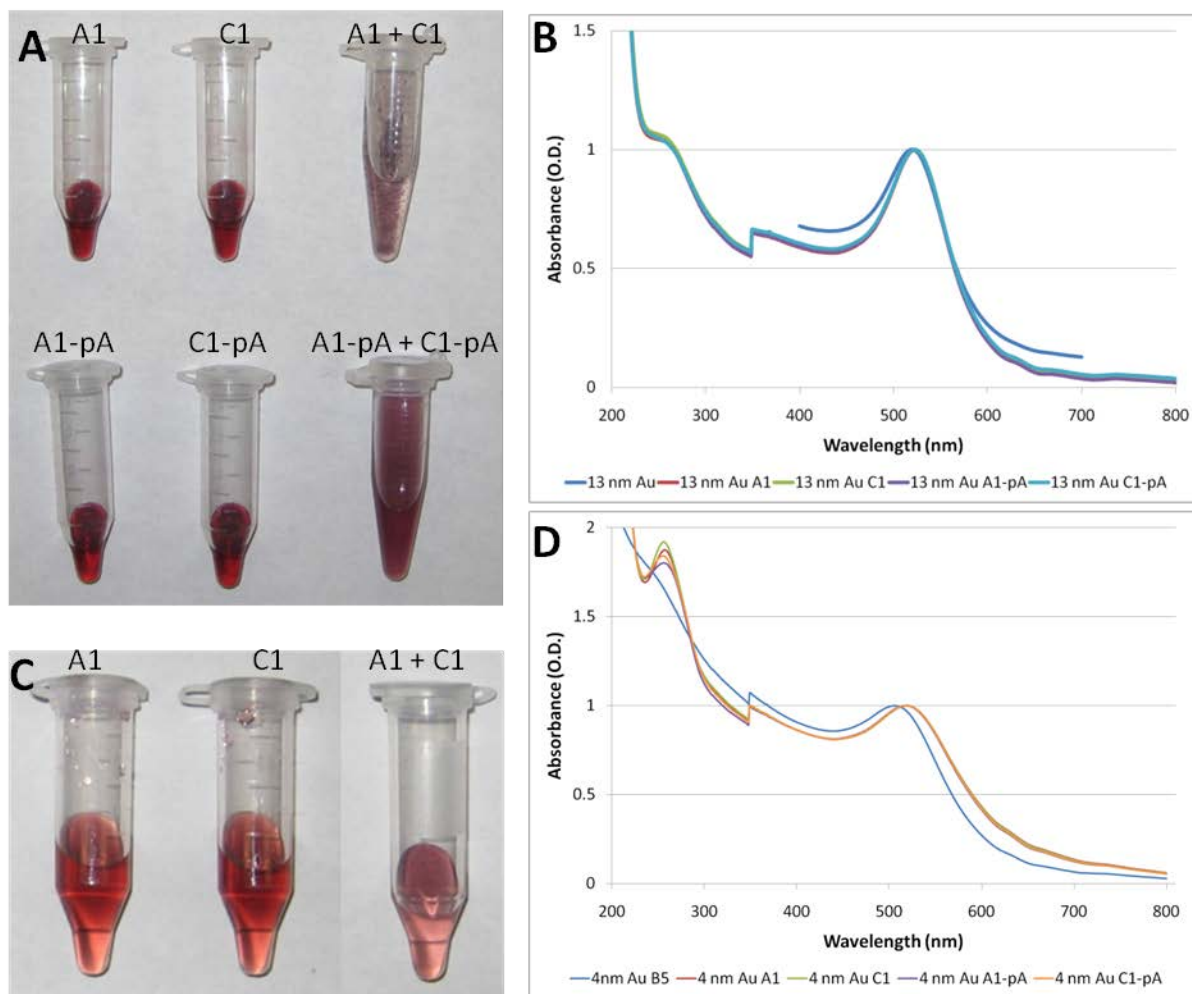

**Figure S2. UV-Vis Absorption Spectra of Unfunctionalized and Functionalized Au NPs and Digital Images.** (A) Digital images of the 13 nm Au NPs during functionalization/hybridization process. (B) UV-Vis absorption spectra of unfunctionalized and ssDNA functionalized 13 nm Au NPs. (C) Digital images of the 4 nm Au NPs during functionalization/hybridization process. (B) UV-Vis absorption spectra of unfunctionalized and ssDNA functionalized 4 nm Au NPs.

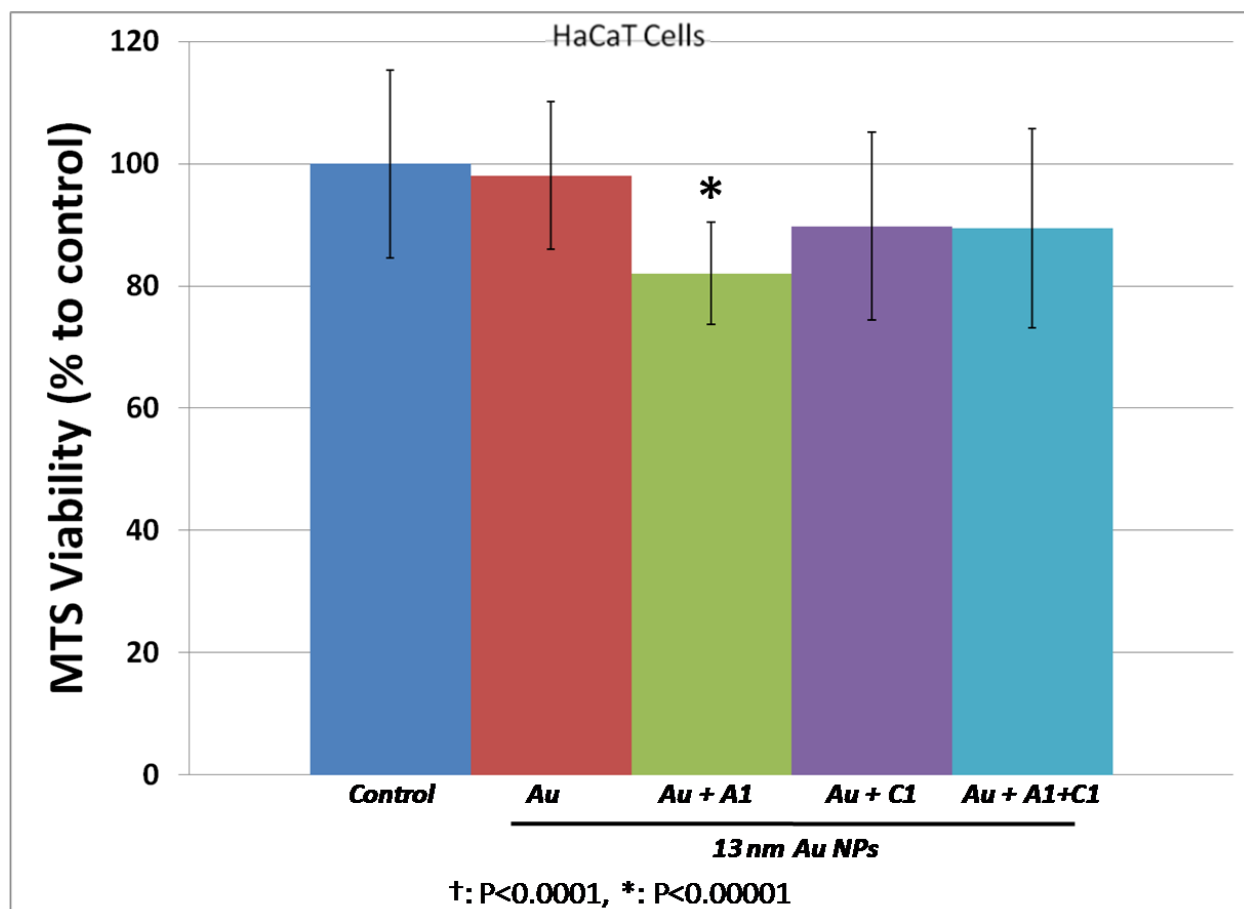

Figure S3. Biocompatibility of Unfunctionalized, Functionalized, and Hybridized 13 nm Au NPs in HaCaT Cells.

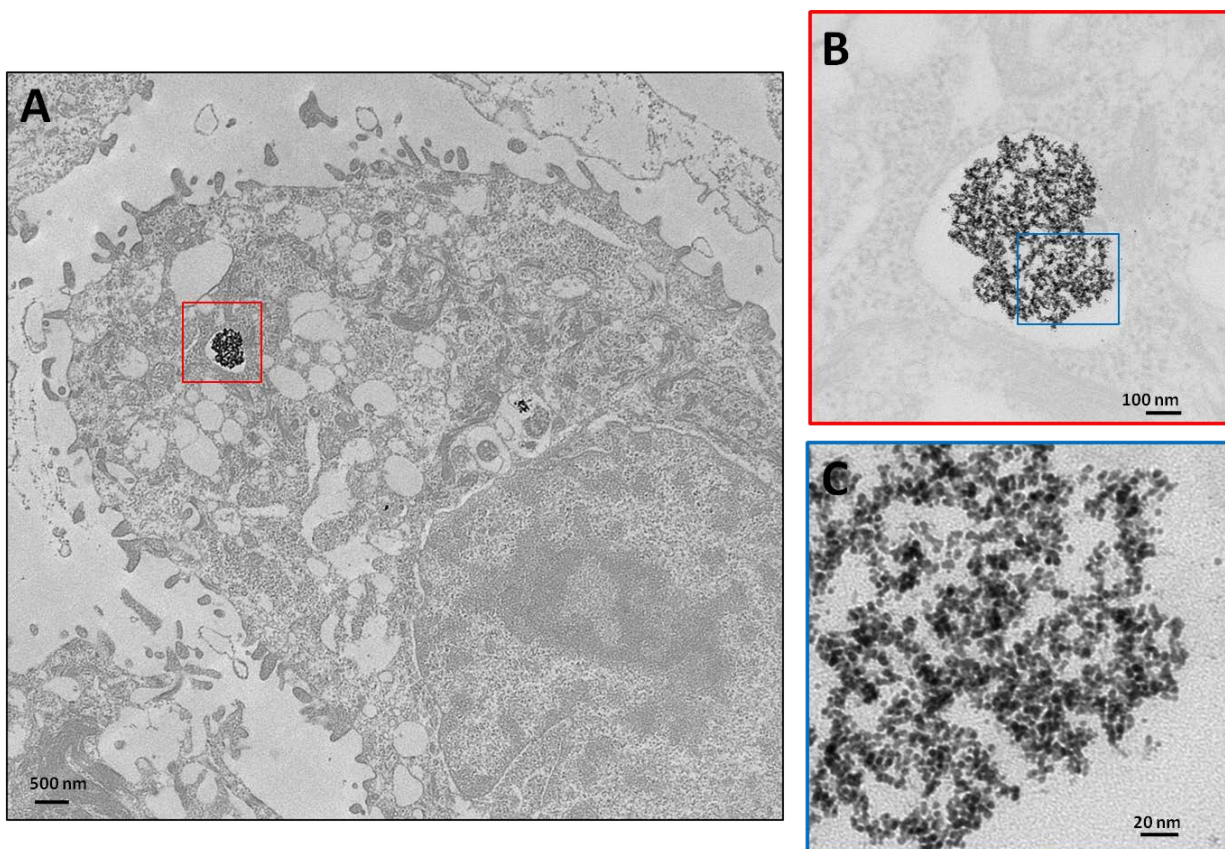

**Figure S4. Uptake of Unfunctionalized 4 nm Au NPs into HaCaT Cells.** Area imaged in (B) is a magnified area of red outlined area in (A). Area imaged in (C) is a magnified area of blue outlined area in (B).
